# Supplementary material for: Solvent-free iridium-catalyzed CO2 hydrosilylation: experiments and kinetic modeling
Source: Royal Society of Chemistry journal article supplement (doi:10.1039/c4cy00815d), 2014-07-30
Supplement: c4cy00815d1.pdf [file c4cy00815d1.pdf]

## Supplementary Information

# Solvent-Free Iridium-Catalyzed Hydrosilylation of CO<sub>2</sub>: Experiments and Kinetic Modeling

E. A. Jaseer,<sup>a</sup> Muhammad N. Akhtar,<sup>a</sup> Mogahid Osman,<sup>a</sup> A. Al-Shammari,<sup>a</sup> Habeebullah  
Oladipo B.,<sup>a</sup> Karin Garcés,<sup>b</sup> Francisco J. Fernández-Alvarez,<sup>\*,b</sup> Sulaiman Al-Khattaf<sup>\*,a</sup>  
and Luis A. Oro<sup>\*,ab</sup>

*(a) Center of Research Excellence in Petroleum Refining & Petrochemicals, King Fahd University of  
Petroleum & Minerals, 31261 Dhahran - Saudi Arabia. E-mail: [skhattaf@kfupm.edu.sa](mailto:skhattaf@kfupm.edu.sa)*

*(b) Departamento de Química Inorgánica-Instituto de Síntesis Química y Catálisis Homogénea (ISQCH),  
Universidad de Zaragoza – CSIC, Facultad de Ciencias 50009, Zaragoza – Spain. E-mail: [paco@unizar.es](mailto:paco@unizar.es),  
[oro@unizar.es](mailto:oro@unizar.es)*

**General Procedure for the Catalytic Reactions of Hydrosilylation of CO<sub>2</sub> with 1,1,1,3,5,5,5-heptamethyltrisiloxane (HMTS) using the complex [IrH(CF<sub>3</sub>SO<sub>3</sub>)(NSiN)(coe)] (3) as catalysts precursor.**

A 25 mL batch reactor with Teflon lining inside was charged with dry HMTS (3 mL, 11.04 mmol). Then the reactor was closed, purged with CO<sub>2</sub> gas few times and heated to the corresponding temperature. After stabilization to the particular temperature, the reactor was opened under argon atmosphere and the iridium catalyst **3** (75 mg, 0.11 mmol), which was weighed in a glove box, was added. After closing the reactor, the mixture was again purged few times using vacuum and CO<sub>2</sub> gas. Then the pressure of CO<sub>2</sub> gas was adjusted to 3 bars. Liquid samples were taken periodically after releasing the CO<sub>2</sub> pressure, without opening the reactor, using a long needle through sample withdrawal valve. The reactor was purged with vacuum and CO<sub>2</sub> several times after each sample withdrawal and the CO<sub>2</sub> pressure was returned back to 3 bars using CO<sub>2</sub>. The samples were diluted using 0.5 ml of anhydrous tetrahydrofuran and analyzed by quantifiable GC-MS. The product yield was obtained by comparison of the integral of the area corresponding to the peaks assigned to the reaction products with the integral of the peak corresponding to the starting material HMTS.

**Examples of GC-MS spectra from reaction samples:**

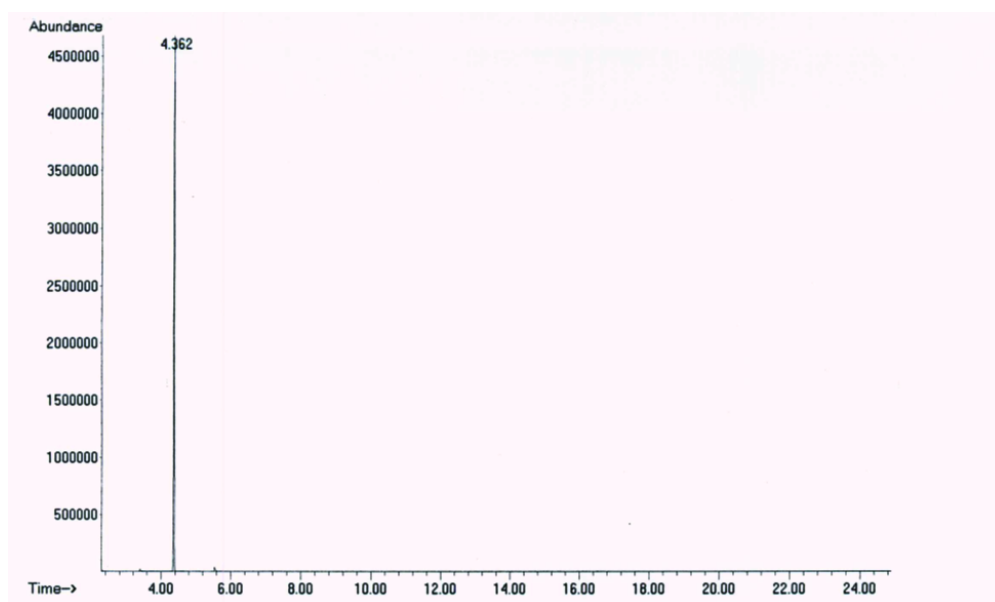

Figure S1. GC spectrum of a sample of the catalytic hydrosilylation of CO<sub>2</sub> with HMTS at 25°C at the beginning of the reactions. A major peak of HMTS (at 4.36 min) and traces of cyclooctane (at 5.70 min) were observed.

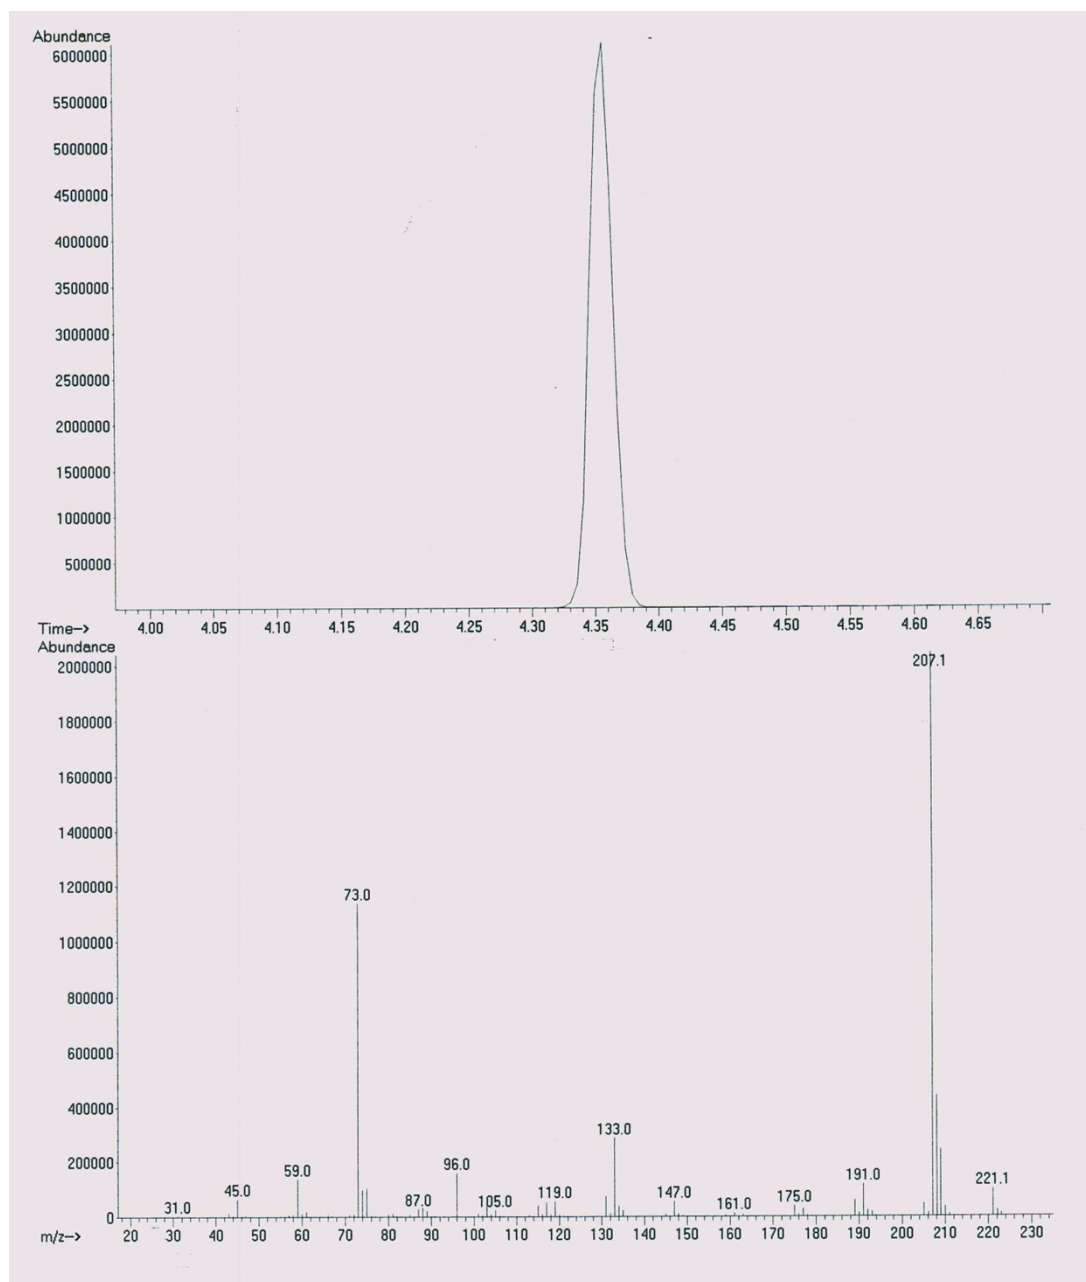

Figure S2. Peak corresponding to the starting HTMS in the GC-MS spectrum of a sample of the catalytic hydrosilylation of CO<sub>2</sub> with HMTS at 25°C at the beginning of the reaction.

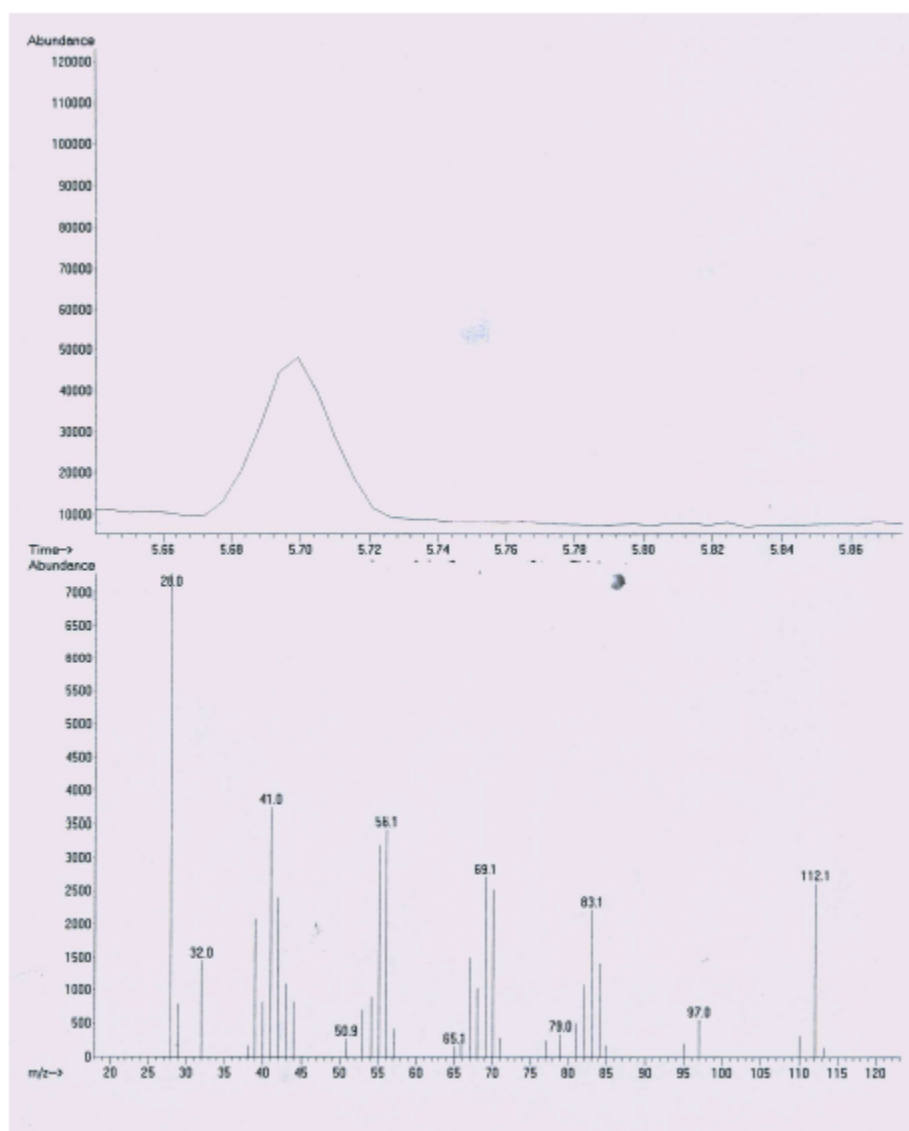

Figure S3. Peak corresponding to cyclooctane in the GC-MS spectrum of a sample of the catalytic hydrosilylation of CO<sub>2</sub> with HMTS at 25°C at the beginning of the reaction.

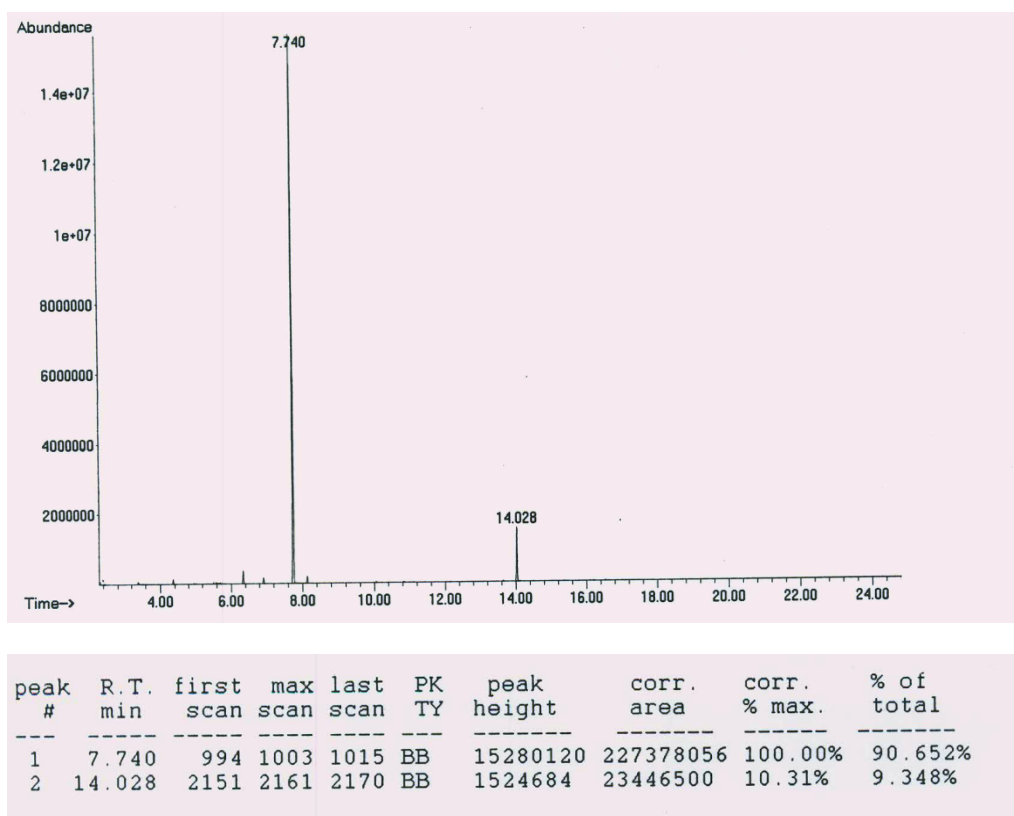

Figure S4. GC-MS spectrum of a sample of the catalytic hydrosilylation of CO<sub>2</sub> with HMTS at 25°C at the end of the reaction. The main peak at 7.74 min corresponds to silyl formate and the minor peak at 14.02 min is due to  $\{(\text{Me}_3\text{SiO})_2\text{MeSi}\}_2\text{O}$ .

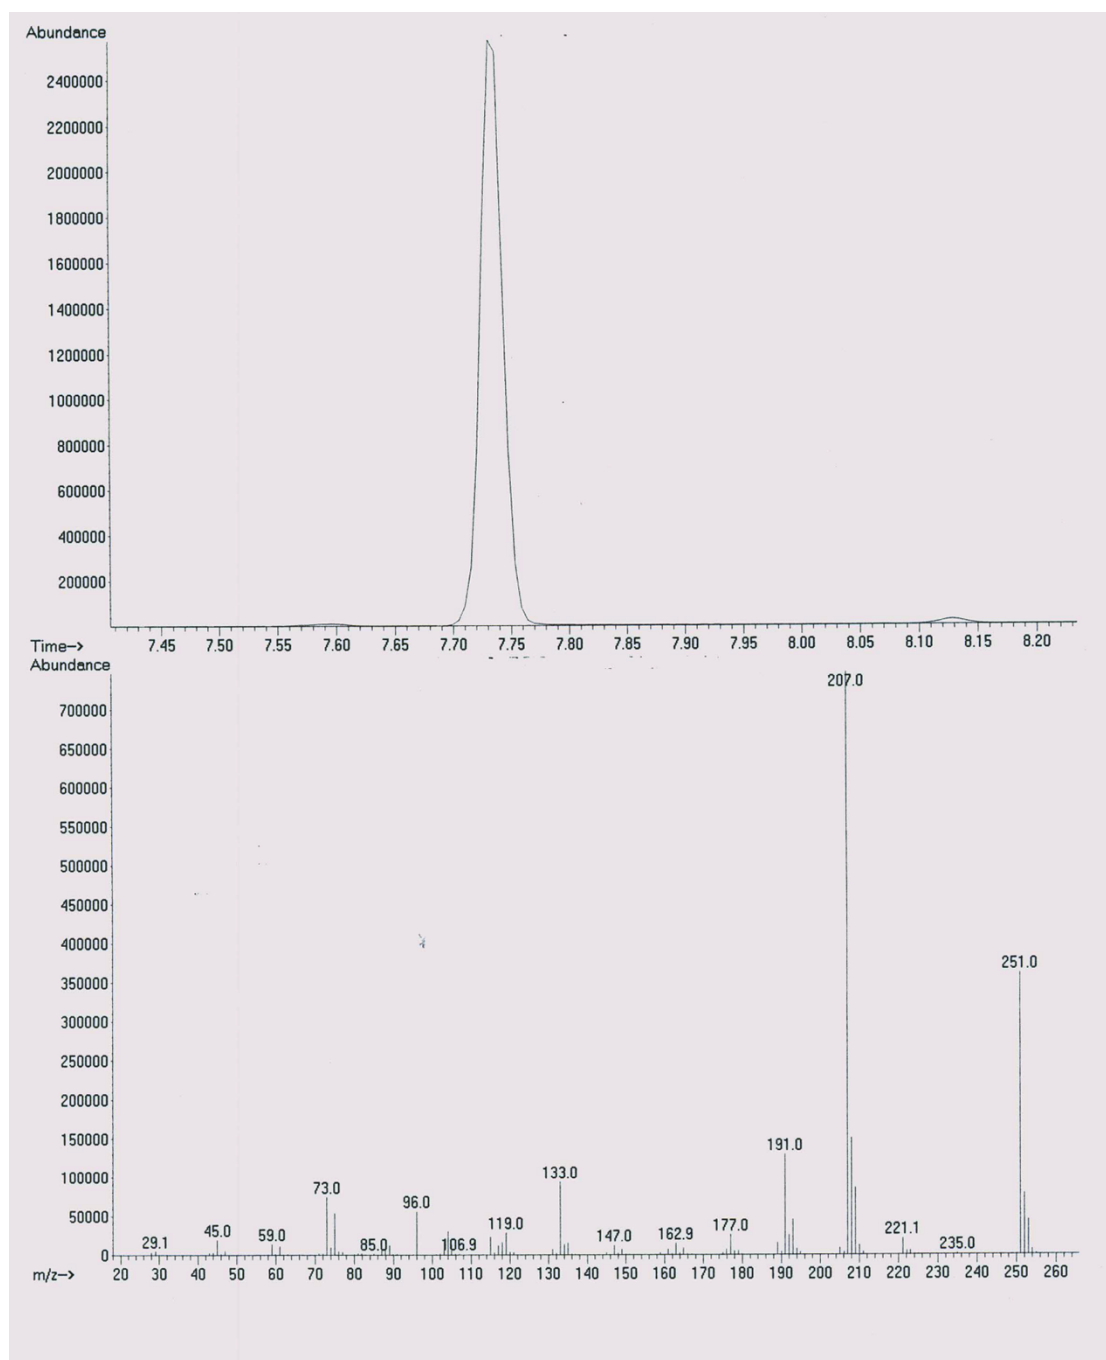

Figure S5. Peak corresponding to silyl formate in the GC-MS spectrum of a sample of the catalytic hydrosilylation of CO<sub>2</sub> with HMTS at 25°C at the end of the reaction.

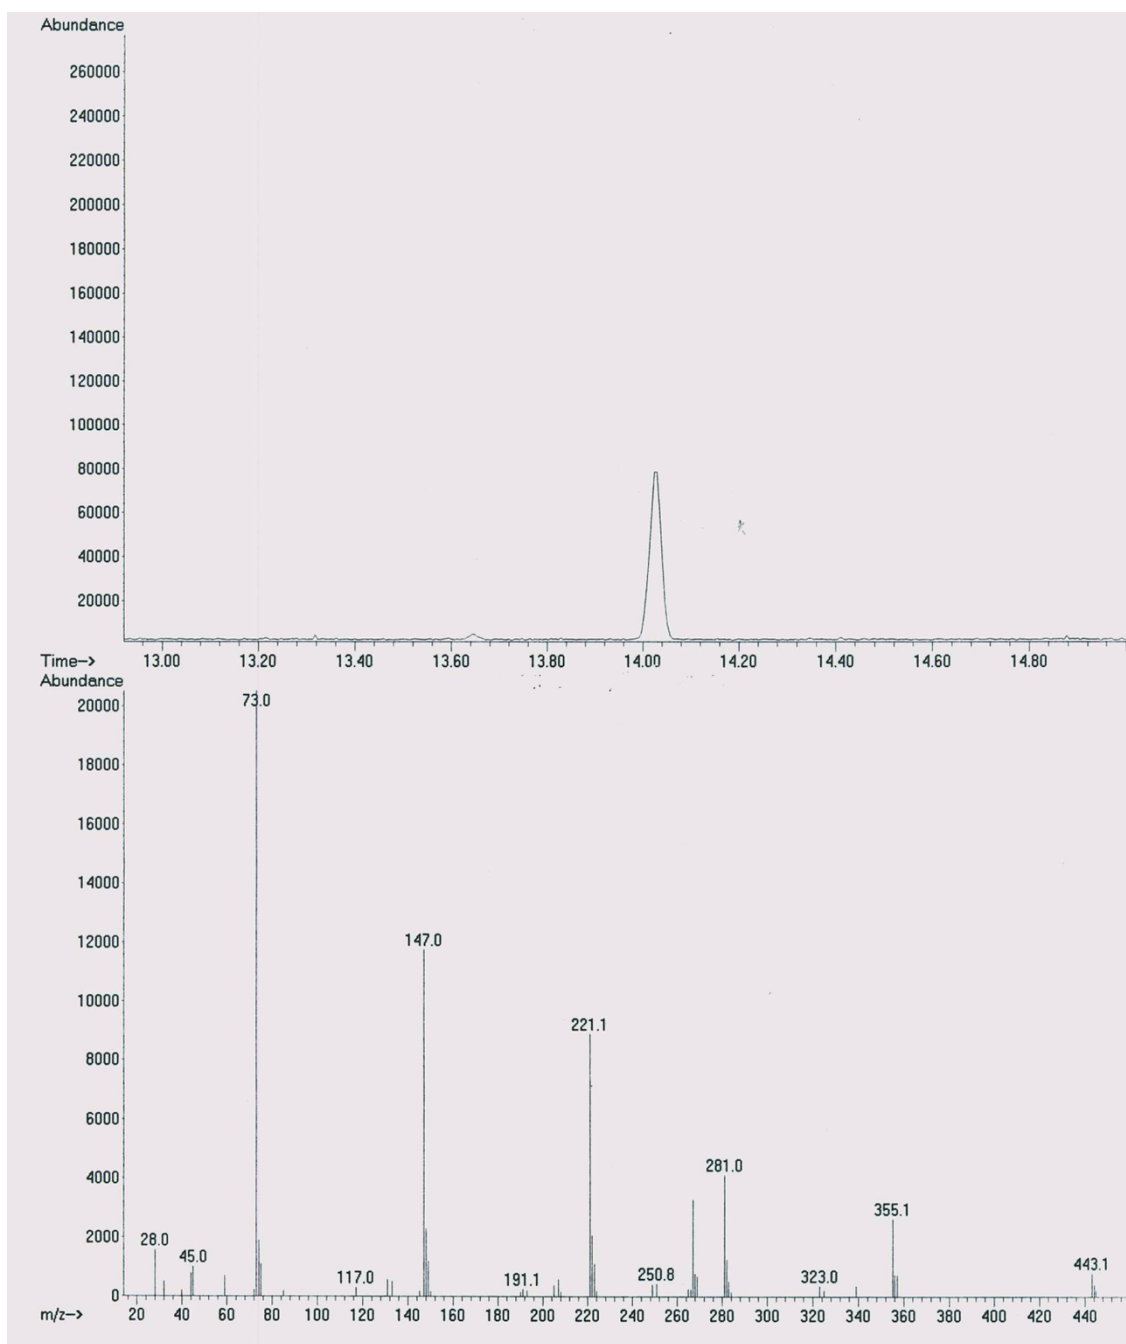

Figure S6. Peak corresponding to  $\{(\text{Me}_3\text{SiO})_2\text{MeSi}\}_2\text{O}$  in the GC-MS spectrum of a sample of the catalytic hydrosilylation of  $\text{CO}_2$  with HMTS at  $25^\circ\text{C}$  at the end of the reaction.



Figure S7:  $^1\text{H}$  NMR (300 MHz,  $\text{CD}_2\text{Cl}_2$ ) of the product of the reaction of  $\text{CO}_2$  (3 bar) with HTMS after 3 days at 25  $^\circ\text{C}$  using **3** (1.0 mol %) as catalyst precursor.

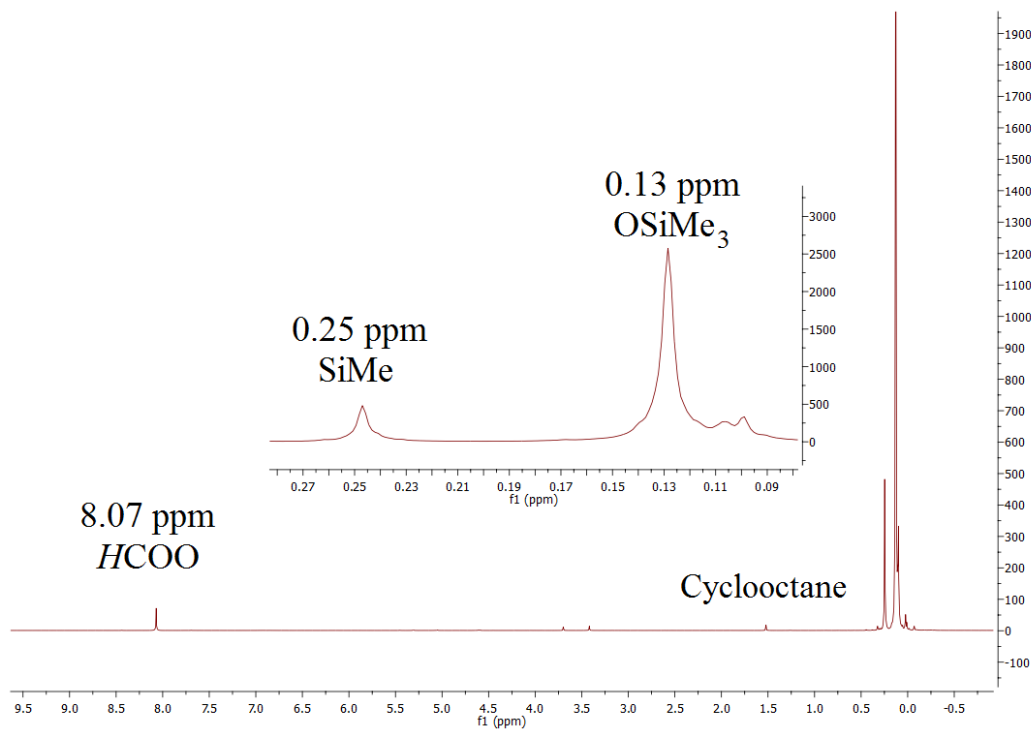

Figure S8:  $^{29}\text{Si}\{^1\text{H}\}$  NMR (79.5 MHz,  $\text{CD}_2\text{Cl}_2$ ) spectra of samples taken from the reaction of  $\text{CO}_2$  (3 bar) at 25 °C using **3** (1.0 mol %) as catalyst precursor.

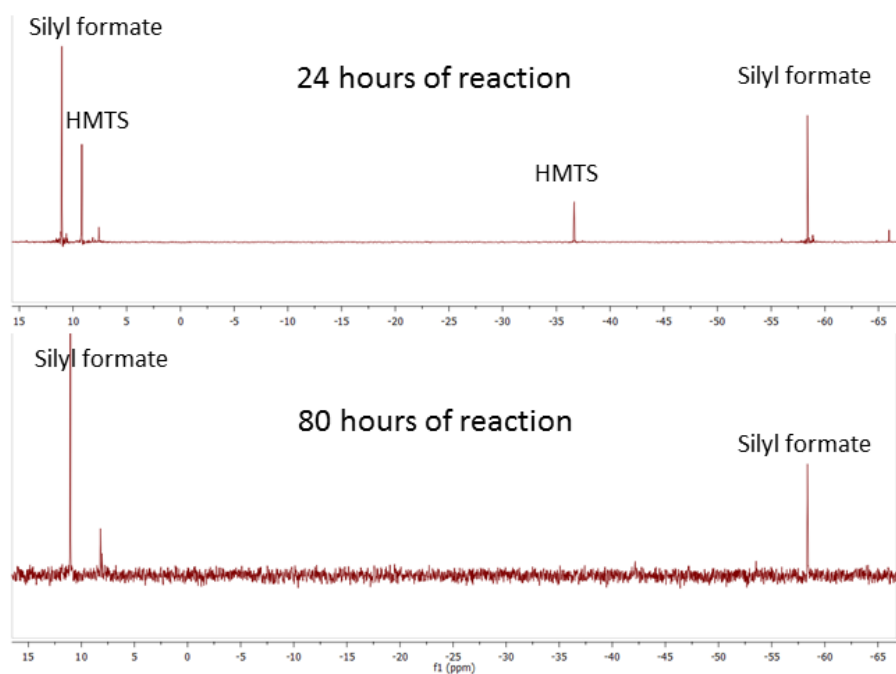

### Reactions in a Young NMR tube.

A Young NMR tube was charged with  $(\text{Me}_3\text{SiO})_2\text{MeSiH}$  (79  $\mu\text{L}$ , 0.30 mmol), complex **3** (23 mg, 0.03 mmol),  $\text{CD}_2\text{Cl}_2$  (0.35 mL) and  $\text{CD}_3\text{CN}$  (0.15 mL). The reaction was monitored by  $^1\text{H}$  NMR at 295 K.

Figure S9:  $^1\text{H}$  NMR (300 MHz,  $\text{CD}_2\text{Cl}_2$ ) of the reaction of complex **3** with 10 equivalents of HMTS in a mixture of  $\text{CD}_2\text{Cl}_2$  and  $\text{CD}_3\text{CN}$  after 4 hours of reaction at r.t.

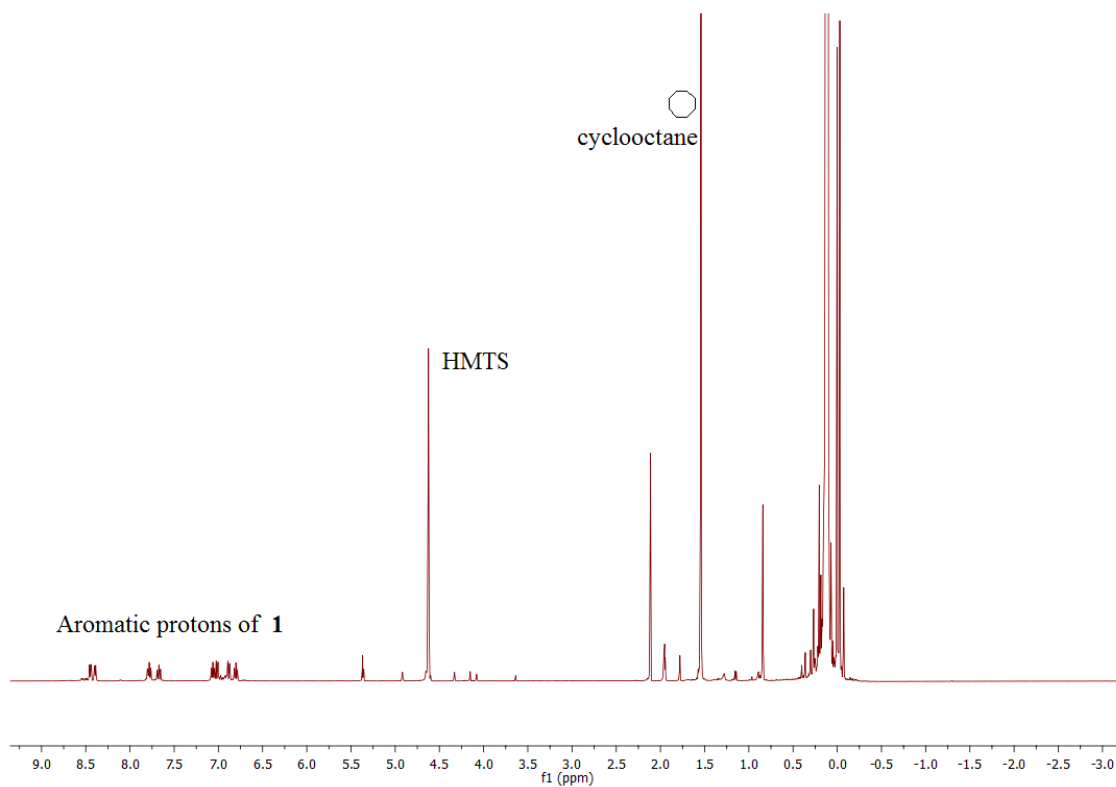

Table S1: Data obtained from the GC-MS studies of the reaction of CO<sub>2</sub> with HTMS using **3** (1.0 mol %) as catalyst precursor at different temperatures. Time is expressed in hours and concentration of HMTS, silylformate and (R<sub>2</sub>MeSi)<sub>2</sub>O (R = (OSiMe<sub>3</sub>)) are expressed in %.

| Room Temperature: 25 C |      |              |                                      |
|------------------------|------|--------------|--------------------------------------|
| Time                   | HMTS | Silylformate | (R <sub>2</sub> MeSi) <sub>2</sub> O |
| 12                     | 99,4 | 0,6          | 0,0                                  |
| 24                     | 97,7 | 1,5          | 0,8                                  |
| 36                     | 88,2 | 9,9          | 1,9                                  |
| 48                     | 56,9 | 37,8         | 5,3                                  |
| 60                     | 23,2 | 70,4         | 6,4                                  |
| 72                     | 6,8  | 83,8         | 9,4                                  |
| 80                     | 1,8  | 88,8         | 9,4                                  |
| Temperature: 35 C      |      |              |                                      |
| 8                      | 98,9 | 0,8          | 0,3                                  |
| 17                     | 89,2 | 9,1          | 1,8                                  |
| 24                     | 55,8 | 40,0         | 4,2                                  |
| 32                     | 11,8 | 82,4         | 5,8                                  |
| 41                     | 1,4  | 91,1         | 7,5                                  |
| Temperature: 45 C      |      |              |                                      |
| 3                      | 99,5 | 0,5          | 0,0                                  |
| 7                      | 95,4 | 3,4          | 1,2                                  |
| 11                     | 56,9 | 39,3         | 3,8                                  |
| 14                     | 22,3 | 71,5         | 6,2                                  |
| 23                     | 0,9  | 91,1         | 8,0                                  |
| Temperature: 55 C      |      |              |                                      |
| 2                      | 96,8 | 2,1          | 1,0                                  |
| 4                      | 50,3 | 44,8         | 4,9                                  |
| 6                      | 13,5 | 79,5         | 6,9                                  |
| 8                      | 3,2  | 89,7         | 7,1                                  |
| 9                      | 1,5  | 87,2         | 11,3                                 |
| Temperature: 65 C      |      |              |                                      |
| 1                      | 71,4 | 25,8         | 2,9                                  |
| 2                      | 32,2 | 60,7         | 7,2                                  |
| 3                      | 17,7 | 78,0         | 4,3                                  |
| 4                      | 9,2  | 85,8         | 5,1                                  |
| 5                      | 4,9  | 85,8         | 9,3                                  |
| Temperature: 75 C      |      |              |                                      |
| 0,5                    | 58,7 | 39,9         | 1,4                                  |
| 1                      | 27,5 | 69,4         | 3,1                                  |
| 1,5                    | 17,8 | 79,3         | 2,9                                  |
| 2                      | 10,4 | 83,1         | 6,5                                  |
| 2,5                    | 4,6  | 90,2         | 5,2                                  |
| 3                      | 2,3  | 87,1         | 10,5                                 |

## Reaction kinetic model for the CO<sub>2</sub> hydrosilylation shown in Scheme S1:

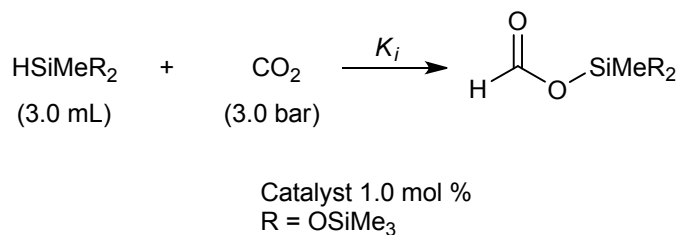

Scheme S1. Catalytic CO<sub>2</sub> hydrosilylation with HMTS using **3** as catalyst precursor.

The following first order differential equations represent the model equations that were derived based on the above scheme.

The rate of the disappearance of HMTS is

$$-\frac{V}{W_c} \frac{dC_{SX}}{dt} = (k_i C_{SX}) \quad (1)$$

The rate of formation of formate:

$$\frac{V}{W_c} \frac{dC_F}{dt} = (k_i C_{SX}) \quad (2)$$

Where  $C_{SX}$ ,  $C_F$  are the molar concentration of HMTS and silyl formate in the system,  $V$  is the volume of the reactor,  $W_c$  is the weight of the catalyst,  $t$  is the time in hours and  $k_i$  is the rate constant at the temperature  $T_i$ .

The molar concentration  $C_x$  can be expressed in term of weight fraction  $y_i$ , of every species in the system, which is the measurable variable from the chromatographic analysis, hence:

$$C_x = \frac{y_x W_f}{MW_x V} \quad (3)$$

Where  $W_f$  is the weight of feed used in the reactor,  $MW_i$  is the molecular weight of the corresponding species  $i$ .

The reaction rate constants are related to temperature through Arrhenius equation:

$$k_i = k_o \exp \left[ -\frac{E_a}{R} \left( \frac{1}{T_i} - \frac{1}{T_o} \right) \right] \quad (4)$$

Where  $k_i$  is the rate constant at the average temperature  $T_i$  and  $E_a$  the apparent activation energy of the reaction.

The model equations (equations 1-4) were evaluated by a least square fitting of the kinetic parameters using the experimental data for the reaction of HMTS with CO<sub>2</sub>. The experimental conversion data points were taken at various reaction times and at different temperature levels ranging from 23 °C to 75 °C. The differential equation was solved by Runge-Kutta method (MATLAB ODE 45 subroutine).<sup>1</sup> The activation energy and the Arrhenius pre-exponential factor were estimated using the Modified Marquadt method technique (MATLAB LSQCURVEFIT subroutine). The optimization criteria for the model evaluation are that all the activation energy and the rate constant had to be positive, all consistent with physical principles.<sup>2</sup>

#### References:

1. D. Marquadt, *J. Appl. Math.* 1963, **11**, 431-441.
2. Details about the regression analysis are described in S. Waziri, A. M. Aitani, S. Al-Khattaf, *Ing. Eng. Chem. Res.*, 2010, **49**, 6376-6387.
